# Supplementary material for: A Study of Greek Graviera Cheese by NMR-Based Metabolomics
Source: MDPI journal article supplement (doi:10.3390/molecules28145488), 2023-07-18

# A study of Greek graviera cheese by NMR-based metabolomics

Evangelia Ralli, Apostolos Spyros\*

NMR Laboratory, Department of Chemistry, University of Crete, Voutes campus, 710 03 Heraklion, Crete, Greece

\* Correspondence: email: aspyros@uoc.gr; Tel:+30 2810545085

## SUPPLEMENTARY MATERIAL

**Table S1:** Sample information including origin, year of production and maturation time.

**Table S2:** Mean, minimum, maximum, and standard deviation values expressed as mg/kg of cheese or % content (lipids) for all metabolites of graviera samples according to geographical origin.

**Table S3:** Analysis of Variance (ANOVA) of Cretan cheese samples. Grouping variable: Area of production (Chania, Rethymnon, Heraklion, Lasithi). Variables with  $p < 0.05$  are marked in red.

**Table S4:** Analysis of Variance (ANOVA) of cheese samples. Grouping variable: Area of production (Crete, Cyclades, Mainland)

**Table S5:** Cross validation ANOVA of the untargeted OPLS-DA model regarding cretan/non cretan origin depicted in Figure 6, right.

**Figure S1:** Permutation diagram of the untargeted PLS-DA model regarding cretan/non cretan origin depicted in Fig. 6, right.

**Figure S2:** Aliphatic region of the  $^1\text{H}$ - $^{13}\text{C}$  multiplicity-edited gHSQC 2D NMR spectrum of the polar extracts of graviera cheese at a  $^1\text{H}$  frequency of 500 MHz, blue contours represent  $\text{CH}/\text{CH}_3$  protons, green contours represent  $\text{CH}_2$  protons.

**Figure S3:** Aromatic region of the  $^1\text{H}$ - $^{13}\text{C}$  multiplicity-edited gHSQC 2D NMR spectrum of the polar extracts of graviera cheese at a  $^1\text{H}$  frequency of 500 MHz, blue contours represent  $\text{CH}/\text{CH}_3$  protons, green contours represent  $\text{CH}_2$  protons.

**Figure S4:** Aliphatic region of the long range  $^1\text{H}$ - $^{13}\text{C}$  gHMBC 2D NMR spectrum of the polar extracts of graviera cheese at a  $^1\text{H}$  frequency of 500 MHz.

**Figure S5:** Aliphatic region of the  $^1\text{H}$ - $^1\text{H}$  gTOCSY 2D NMR spectrum of the polar extracts of graviera cheese at a  $^1\text{H}$  frequency of 500 MHz.

**Table S1.** Sample information including origin, year of production and maturation time.

| Sample | Origin     | Area       | Region   | Year | Maturation |
|--------|------------|------------|----------|------|------------|
| 1      | Cretan     | Heraklion  | Crete    | 2012 | 8          |
| 2      | Cretan     | Heraklion  | Crete    | 2012 | 8          |
| 3      | Cretan     | Chania     | Crete    | 2012 | 4          |
| 4      | Cretan     | Heraklion  | Crete    | 2012 | 9          |
| 5      | Cretan     | Heraklion  | Crete    | 2012 | 8          |
| 6      | Cretan     | Heraklion  | Crete    | 2012 | 12         |
| 7      | Cretan     | Heraklion  | Crete    | 2012 | 22         |
| 8      | Cretan     | Rethimno   | Crete    | 2012 | 7          |
| 9      | Cretan     | Rethimno   | Crete    | 2012 | 5          |
| 10     | Cretan     | Heraklion  | Crete    | 2012 | 8          |
| 11     | Cretan     | Heraklion  | Crete    | 2013 | 8          |
| 12     | Cretan     | Heraklion  | Crete    | 2013 | 10         |
| 13     | Cretan     | Heraklion  | Crete    | 2013 | 9          |
| 14     | Cretan     | Heraklion  | Crete    | 2013 | 11         |
| 15     | Cretan     | Heraklion  | Crete    | 2013 | 12         |
| 16     | Cretan     | Rethimno   | Crete    | 2013 | 12         |
| 17     | Cretan     | Rethimno   | Crete    | 2013 | 3          |
| 18     | Cretan     | Rethimno   | Crete    | 2013 | 13         |
| 19     | Cretan     | Rethimno   | Crete    | 2013 | 12         |
| 20     | Cretan     | Heraklion  | Crete    | 2013 | 3          |
| 21     | Cretan     | Heraklion  | Crete    | 2013 | 3          |
| 22     | Cretan     | Rethimno   | Crete    | 2013 | 10         |
| 23     | Cretan     | Rethimno   | Crete    | 2013 | 5          |
| 24     | Cretan     | Heraklion  | Crete    | 2014 | 8          |
| 25     | Cretan     | Heraklion  | Crete    | 2013 | 4          |
| 26     | Cretan     | Heraklion  | Crete    | 2014 | 10         |
| 27     | Cretan     | Rethimno   | Crete    | 2014 | 5          |
| 28     | Cretan     | Rethimno   | Crete    | 2014 | 4          |
| 29     | Cretan     | Rethimno   | Crete    | 2014 | 5          |
| 30     | Cretan     | Heraklion  | Crete    | 2014 | 3          |
| 31     | Non cretan | Mytilini   | -        | 2014 | 6          |
| 32     | Non cretan | Athens     | Mainland | 2013 | 13         |
| 33     | Non cretan | Thrace     | Mainland | 2014 | 5          |
| 34     | Non cretan | Naxos      | Cyclades | 2014 | 6          |
| 35     | Non cretan | Tinos      | Cyclades | 2013 | 10         |
| 36     | Non cretan | Amphilohia | Mainland | 2013 | 8          |
| 37     | Non cretan | Mainalo    | Mainland | 2013 | 9          |
| 38     | Cretan     | Chania     | Crete    | 2014 | 5          |
| 39     | Non cretan | Athens     | Mainland | 2014 | 7          |
| 40     | Cretan     | Rethimno   | Crete    | 2014 | 4          |
| 41     | Cretan     | Rethimno   | Crete    | 2013 | 15         |
| 42     | Cretan     | Heraklion  | Crete    | 2014 | 9          |
| 43     | Cretan     | Heraklion  | Crete    | 2014 | 10         |
| 44     | Cretan     | Heraklion  | Crete    | 2014 | 4          |
| 45     | Cretan     | Rethimno   | Crete    | 2014 | 11         |
| 46     | Cretan     | -          | Crete    | 2014 | 7          |
| 47     | Cretan     | Rethimno   | Crete    | 2014 | 6          |
| 48     | Cretan     | Heraklion  | Crete    | 2014 | 10         |
| 49     | Non cretan | Naxos      | Cyclades | 2014 | 6          |

|    |            |            |          |      |    |
|----|------------|------------|----------|------|----|
| 50 | Non cretan | Trikala    | Mainland | 2014 | 6  |
| 51 | Non cretan | Arta       | Mainland | 2014 | 13 |
| 52 | Non cretan | Athens     | Mainland | 2014 | 10 |
| 53 | Non cretan | Tinos      | Cyclades | 2014 | 6  |
| 54 | Non cretan | Ios        | Cyclades | 2014 | 13 |
| 55 | Non cretan | Mytilini   | -        | 2014 | 10 |
| 56 | Non cretan | Amphilohia | Mainland | 2014 | 11 |
| 57 | Cretan     | Rethimno   | Crete    | 2014 | 5  |
| 58 | Cretan     | Heraklion  | Crete    | 2017 | 9  |
| 59 | Cretan     | Heraklion  | Crete    | 2017 | 8  |
| 60 | Cretan     | Chania     | Crete    | 2018 | 9  |
| 61 | Cretan     | Chania     | Crete    | 2018 | 10 |
| 62 | Cretan     | Chania     | Crete    | 2018 | 10 |
| 63 | Cretan     | -          | Crete    | 2018 | 5  |
| 64 | Cretan     | Rethimno   | Crete    | 2018 | 8  |
| 65 | Cretan     | Rethimno   | Crete    | 2018 | 4  |
| 66 | Non cretan | Korinthos  | Mainland | 2018 | 7  |
| 67 | Cretan     | Lasithi    | Crete    | 2018 | 10 |
| 68 | Cretan     | Rethimno   | Crete    | 2018 | 10 |
| 69 | Cretan     | Heraklion  | Crete    | 2018 | 8  |
| 70 | Cretan     | Heraklion  | Crete    | 2019 | 5  |
| 71 | Cretan     | Heraklion  | Crete    | 2018 | 8  |
| 72 | Cretan     | Heraklion  | Crete    | 2018 | 11 |
| 73 | Cretan     | Lasithi    | Crete    | 2019 | 6  |
| 74 | Cretan     | Chania     | Crete    | 2019 | 6  |

**Table S2.** Mean, minimum, maximum, standard deviation values expressed as mg/kg of cheese or % content (lipids) for all metabolites of graviera samples according to geographical origin.

|               | Heraklion |         |          |          | Rethymnon |         |          |         |
|---------------|-----------|---------|----------|----------|-----------|---------|----------|---------|
|               | n=28      |         |          |          | n=19      |         |          |         |
|               | AVERAGE   | Min     | Max      | STDEV    | AVERAGE   | Min     | Max      | STDEV   |
| Lactate       | 15153.90  | 6230.08 | 26997.84 | 4605.71  | 13029.05  | 6338.41 | 17507.53 | 2983.44 |
| Citrate       | 680.01    | 0.00    | 1572.75  | 493.44   | 313.62    | 0.00    | 1192.97  | 398.33  |
| Succinate     | 375.85    | 0.00    | 1135.88  | 293.54   | 403.13    | 23.39   | 1339.31  | 405.60  |
| Acetate       | 222.65    | 0.00    | 741.93   | 177.07   | 343.52    | 29.85   | 1238.04  | 340.20  |
| Valine        | 1635.43   | 229.55  | 5206.79  | 1262.46  | 886.84    | 88.62   | 2883.63  | 685.34  |
| Isoleucine    | 1088.42   | 107.29  | 3794.30  | 1006.36  | 465.30    | 60.62   | 2317.80  | 524.35  |
| Alanine       | 910.09    | 61.36   | 2640.15  | 630.99   | 463.18    | 65.72   | 2208.88  | 496.98  |
| Threonine     | 383.91    | 31.94   | 1431.51  | 358.77   | 137.90    | 0.00    | 632.46   | 158.28  |
| Phenylalanine | 1343.88   | 79.66   | 3866.02  | 949.63   | 613.19    | 28.74   | 2106.17  | 499.57  |
| Tyrosine      | 340.07    | 21.65   | 1093.76  | 320.08   | 139.77    | 18.14   | 704.89   | 187.41  |
| Tyramine      | 106.43    | 0.00    | 561.45   | 117.94   | 87.57     | 0.00    | 206.59   | 47.68   |
| Aspartate     | 774.75    | 151.97  | 2588.00  | 740.31   | 353.64    | 0.00    | 1986.88  | 446.74  |
| Asparagine    | 1140.43   | 0.00    | 3389.77  | 904.70   | 498.99    | 0.00    | 1959.84  | 480.02  |
| Glycine       | 247.79    | 21.14   | 971.52   | 257.11   | 110.23    | 6.84    | 706.88   | 158.87  |
| Methionine    | 761.10    | 100.49  | 2266.39  | 557.76   | 412.74    | 62.67   | 1078.70  | 273.01  |
| Proline       | 2316.13   | 162.28  | 15408.10 | 3048.75  | 711.68    | 0.00    | 3620.73  | 870.85  |
| Glutamate     | 3724.94   | 0.00    | 12049.15 | 3164.99  | 1487.12   | 0.00    | 5094.84  | 1300.15 |
| Lysine        | 1964.04   | 0.00    | 7082.58  | 1640.93  | 1110.32   | 0.00    | 6002.18  | 1339.21 |
| Glutamine     | 733.52    | 0.00    | 3704.04  | 876.97   | 194.49    | 0.00    | 752.56   | 213.52  |
| Tryptophane   | 87.19     | 16.39   | 354.03   | 83.19    | 39.71     | 0.00    | 140.17   | 31.98   |
| Uracil        | 29.84     | 6.32    | 65.46    | 13.39    | 20.11     | 1.41    | 49.45    | 11.93   |
| Glycerol      | 247.97    | 0.00    | 913.89   | 232.28   | 130.89    | 0.00    | 312.59   | 92.91   |
| Benzoate      | 16.36     | 5.70    | 34.15    | 6.23     | 12.34     | 0.00    | 25.68    | 5.49    |
| Ornithine     | 574.00    | 0.00    | 2191.32  | 553.93   | 277.19    | 0.00    | 787.69   | 226.12  |
| Choline       | 25.37     | 0.00    | 106.87   | 21.54    | 29.73     | 10.49   | 80.24    | 15.74   |
| GABA          | 161.28    | 0.00    | 1754.25  | 406.93   | 477.93    | 0.00    | 1220.86  | 495.05  |
| Cytosine      | 4.96      | 0.00    | 11.76    | 4.04     | 0.35      | 0.00    | 3.88     | 1.07    |
| Propionate    | 0.03      | 0.00    | 0.78     | 0.15     | 0.28      | 0.00    | 5.34     | 1.22    |
| Butyrate      | 0.78      | 0.00    | 21.16    | 4.00     | 0.12      | 0.00    | 2.37     | 0.54    |
| Galactose     | 1.41      | 0.00    | 27.62    | 5.60     | 0.00      | 0.00    | 0.00     | 0.00    |
| CLA           | 0.98      | 0.54    | 1.41     | 0.21     | 0.82      | 0.57    | 1.03     | 0.13    |
| caproic       | 0.39      | 0.20    | 0.57     | 0.08     | 0.50      | 0.38    | 0.59     | 0.06    |
| butyric       | 8.38      | 6.05    | 9.97     | 0.95     | 7.74      | 5.49    | 9.60     | 1.27    |
| LN            | 0.92      | 0.49    | 1.39     | 0.24     | 0.74      | 0.15    | 1.08     | 0.24    |
| LO            | 2.33      | 1.74    | 3.31     | 0.39     | 2.62      | 1.61    | 3.77     | 0.54    |
| OL            | 23.85     | 20.15   | 33.99    | 2.82     | 20.40     | 12.05   | 24.49    | 2.57    |
| SAT           | 63.55     | 54.33   | 68.95    | 2.94     | 67.70     | 63.92   | 75.38    | 2.79    |
| Sterols       | 0.15      | 0.13    | 0.17     | 0.01     | 0.16      | 0.11    | 0.21     | 0.02    |
| 1,2-DG        | 1.56      | 0.68    | 2.95     | 0.54     | 1.50      | 0.94    | 3.69     | 0.66    |
| TFAA          | 17451.68  | 2231.17 | 54088.44 | 13785.94 | 7625.11   | 881.14  | 30406.89 | 6724.49 |

|               | Chania   |         |          |         | Lasithi  |          |          |         |
|---------------|----------|---------|----------|---------|----------|----------|----------|---------|
|               | n=6      |         |          |         | n=2      |          |          |         |
|               | AVERAGE  | Min     | Max      | STDEV   | AVERAGE  | Min      | Max      | STDEV   |
| Lactate       | 10175.76 | 6173.15 | 13022.67 | 2696.21 | 15971.97 | 15056.31 | 16887.63 | 1294.94 |
| Citrate       | 65.77    | 0.00    | 309.46   | 124.15  | 934.27   | 878.94   | 989.59   | 78.24   |
| Succinate     | 367.53   | 89.55   | 752.62   | 293.69  | 208.32   | 188.09   | 228.55   | 28.60   |
| Acetate       | 197.64   | 95.23   | 303.12   | 85.67   | 57.61    | 0.00     | 115.23   | 81.48   |
| Valine        | 865.30   | 537.10  | 1585.49  | 392.53  | 1737.03  | 1514.19  | 1959.87  | 315.14  |
| Isoleucine    | 523.09   | 232.24  | 1251.04  | 378.93  | 1460.95  | 1218.65  | 1703.26  | 342.67  |
| Alanine       | 578.70   | 230.84  | 983.69   | 255.92  | 1253.44  | 1153.68  | 1353.19  | 141.08  |
| Threonine     | 193.93   | 33.97   | 370.39   | 128.52  | 433.99   | 325.47   | 542.51   | 153.47  |
| Phenylalanine | 625.15   | 289.12  | 1239.74  | 342.90  | 1405.11  | 1359.05  | 1451.17  | 65.14   |
| Tyrosine      | 140.66   | 0.00    | 595.29   | 230.18  | 390.13   | 174.45   | 605.80   | 305.01  |
| Tyramine      | 59.89    | 24.87   | 125.83   | 37.58   | 20.97    | 0.00     | 41.95    | 29.66   |
| Aspartate     | 339.67   | 204.24  | 613.13   | 150.85  | 826.38   | 731.67   | 921.09   | 133.94  |
| Asparagine    | 552.97   | 188.67  | 1432.26  | 460.41  | 1623.52  | 1418.18  | 1828.87  | 290.40  |
| Glycine       | 128.27   | 57.37   | 262.20   | 73.18   | 339.83   | 316.34   | 363.33   | 33.23   |
| Methionine    | 416.40   | 237.71  | 614.66   | 154.38  | 860.54   | 681.70   | 1039.38  | 252.91  |
| Proline       | 901.79   | 463.64  | 2260.89  | 684.94  | 2302.69  | 2008.96  | 2596.43  | 415.41  |
| Glutamate     | 2081.42  | 1208.23 | 3799.17  | 943.39  | 4020.59  | 3418.77  | 4622.40  | 851.09  |
| Lysine        | 1210.01  | 501.98  | 2326.42  | 624.66  | 3150.61  | 2658.97  | 3642.26  | 695.29  |
| Glutamine     | 242.32   | 0.00    | 717.78   | 266.17  | 1349.77  | 1065.04  | 1634.49  | 402.66  |
| Tryptophane   | 34.34    | 20.08   | 59.43    | 14.91   | 68.18    | 44.43    | 91.92    | 33.58   |
| Uracil        | 21.03    | 12.74   | 35.45    | 8.32    | 40.95    | 35.97    | 45.94    | 7.05    |
| Glycerol      | 165.58   | 43.45   | 249.70   | 69.98   | 161.83   | 105.15   | 218.50   | 80.15   |
| Benzoate      | 10.23    | 5.16    | 19.53    | 5.79    | 16.21    | 11.14    | 21.28    | 7.17    |
| Ornithine     | 359.94   | 71.18   | 848.79   | 277.00  | 0.00     | 0.00     | 0.00     | 0.00    |
| Choline       | 19.55    | 10.55   | 26.06    | 5.34    | 21.71    | 10.55    | 32.87    | 15.78   |
| GABA          | 74.69    | 0.00    | 448.15   | 182.96  | 0.00     | 0.00     | 0.00     | 0.00    |
| Cytosine      | 2.03     | 0.00    | 7.69     | 2.98    | 10.03    | 6.75     | 13.31    | 4.64    |
| Propionate    | 0.00     | 0.00    | 0.00     | 0.00    | 0.00     | 0.00     | 0.00     | 0.00    |
| Butyrate      | 0.00     | 0.00    | 0.00     | 0.00    | 0.00     | 0.00     | 0.00     | 0.00    |
| Galactose     | 0.00     | 0.00    | 0.00     | 0.00    | 0.00     | 0.00     | 0.00     | 0.00    |
| CLA           | 0.87     | 0.73    | 1.05     | 0.11    | 1.05     | 0.73     | 1.37     | 0.45    |
| caproic       | 0.56     | 0.42    | 0.66     | 0.08    | 0.50     | 0.45     | 0.54     | 0.06    |
| butyric       | 8.52     | 6.49    | 9.49     | 1.07    | 9.56     | 8.73     | 10.40    | 1.18    |
| LN            | 0.83     | 0.53    | 0.92     | 0.15    | 1.08     | 0.71     | 1.45     | 0.52    |
| LO            | 2.50     | 2.22    | 3.14     | 0.34    | 2.29     | 2.07     | 2.50     | 0.31    |
| OL            | 20.57    | 19.56   | 22.85    | 1.21    | 20.83    | 20.27    | 21.39    | 0.79    |
| SAT           | 66.71    | 65.78   | 67.63    | 0.66    | 65.19    | 64.44    | 65.94    | 1.06    |
| Sterols       | 0.16     | 0.14    | 0.17     | 0.02    | 0.16     | 0.16     | 0.17     | 0.01    |
| 1,2-DG        | 1.22     | 0.65    | 1.66     | 0.37    | 0.88     | 0.84     | 0.91     | 0.05    |
| TFAA          | 8834.01  | 5040.18 | 18088.78 | 4879.64 | 21222.76 | 18089.55 | 24355.97 | 4431.03 |

|               | Mainland |          |          |         | Lesvos   |          |          |         |
|---------------|----------|----------|----------|---------|----------|----------|----------|---------|
|               | n=10     |          |          |         | n=2      |          |          |         |
|               | AVERAGE  | Min      | Max      | STDEV   | AVERAGE  | Min      | Max      | STDEV   |
| Lactate       | 16851.25 | 11310.36 | 37828.97 | 7637.28 | 13643.80 | 12379.94 | 14907.66 | 1787.37 |
| Citrate       | 496.03   | 0.00     | 1229.99  | 539.73  | 169.00   | 0.00     | 337.99   | 239.00  |
| Succinate     | 429.51   | 43.77    | 768.18   | 264.37  | 238.25   | 51.49    | 425.02   | 264.13  |
| Acetate       | 312.05   | 52.13    | 879.84   | 243.87  | 106.02   | 59.79    | 152.26   | 65.38   |
| Valine        | 1433.06  | 354.63   | 2846.75  | 705.23  | 485.62   | 307.87   | 663.37   | 251.38  |
| Isoleucine    | 754.96   | 191.51   | 2264.06  | 617.03  | 254.06   | 182.18   | 325.95   | 101.66  |
| Alanine       | 786.75   | 277.27   | 1689.97  | 434.31  | 233.81   | 149.12   | 318.49   | 119.77  |
| Threonine     | 277.77   | 116.37   | 792.05   | 202.52  | 68.79    | 49.36    | 88.22    | 27.48   |
| Phenylalanine | 1456.59  | 307.37   | 2600.44  | 744.68  | 414.10   | 114.38   | 713.82   | 423.87  |
| Tyrosine      | 330.19   | 44.67    | 749.97   | 256.18  | 35.05    | 28.67    | 41.43    | 9.02    |
| Tyramine      | 124.11   | 0.00     | 237.53   | 94.03   | 94.85    | 52.14    | 137.55   | 60.39   |
| Aspartate     | 465.45   | 0.00     | 1476.24  | 474.78  | 154.70   | 104.44   | 204.96   | 71.08   |
| Asparagine    | 961.48   | 362.20   | 2158.03  | 590.28  | 322.86   | 221.14   | 424.58   | 143.86  |
| Glycine       | 776.21   | 39.75    | 5940.14  | 1823.76 | 44.80    | 30.36    | 59.24    | 20.42   |
| Methionine    | 652.97   | 173.94   | 1406.38  | 363.84  | 244.50   | 174.78   | 314.21   | 98.60   |
| Proline       | 1556.84  | 681.17   | 3335.64  | 827.63  | 423.32   | 197.70   | 648.94   | 319.08  |
| Glutamate     | 2568.84  | 1173.79  | 5363.35  | 1534.57 | 1016.97  | 435.20   | 1598.75  | 822.75  |
| Lysine        | 2033.81  | 944.24   | 3912.32  | 990.42  | 443.42   | 0.00     | 886.85   | 627.10  |
| Glutamine     | 653.18   | 32.03    | 1933.03  | 518.70  | 0.00     | 0.00     | 0.00     | 0.00    |
| Tryptophane   | 95.74    | 30.27    | 151.07   | 40.98   | 32.09    | 25.52    | 38.65    | 9.28    |
| Uracil        | 26.94    | 12.33    | 58.55    | 14.05   | 16.79    | 11.97    | 21.61    | 6.82    |
| Glycerol      | 263.85   | 74.27    | 774.91   | 230.36  | 124.20   | 120.93   | 127.46   | 4.62    |
| Benzoate      | 15.81    | 3.62     | 24.90    | 5.91    | 11.99    | 10.14    | 13.85    | 2.63    |
| Ornithine     | 465.75   | 0.00     | 1163.60  | 338.81  | 241.04   | 106.08   | 376.01   | 190.87  |
| Choline       | 34.55    | 11.25    | 89.36    | 23.98   | 30.05    | 16.09    | 44.01    | 19.74   |
| GABA          | 1348.01  | 0.00     | 4873.25  | 1641.61 | 0.00     | 0.00     | 0.00     | 0.00    |
| Cytosine      | 5.40     | 0.00     | 10.56    | 3.34    | 1.84     | 0.00     | 3.67     | 2.60    |
| Propionate    | 0.00     | 0.00     | 0.00     | 0.00    | 0.00     | 0.00     | 0.00     | 0.00    |
| Butyrate      | 0.54     | 0.00     | 5.38     | 1.70    | 0.00     | 0.00     | 0.00     | 0.00    |
| Galactose     | 0.00     | 0.00     | 0.00     | 0.00    | 0.00     | 0.00     | 0.00     | 0.00    |
| CLA           | 0.73     | 0.36     | 1.48     | 0.33    | 0.69     | 0.68     | 0.70     | 0.02    |
| caproic       | 0.54     | 0.47     | 0.59     | 0.04    | 0.35     | 0.33     | 0.37     | 0.02    |
| butyric       | 7.79     | 6.56     | 9.58     | 0.82    | 8.29     | 7.94     | 8.64     | 0.49    |
| LN            | 0.85     | 0.51     | 1.36     | 0.26    | 0.56     | 0.22     | 0.90     | 0.48    |
| LO            | 2.26     | 1.94     | 2.54     | 0.16    | 3.43     | 2.81     | 4.05     | 0.88    |
| OL            | 21.28    | 19.09    | 23.41    | 1.50    | 20.93    | 20.60    | 21.27    | 0.47    |
| SAT           | 67.08    | 64.35    | 69.77    | 1.89    | 66.09    | 65.68    | 66.51    | 0.59    |
| Sterols       | 0.17     | 0.14     | 0.19     | 0.01    | 0.14     | 0.13     | 0.15     | 0.01    |
| 1,2-DG        | 1.94     | 0.84     | 3.58     | 0.83    | 1.13     | 1.08     | 1.18     | 0.07    |
| TFAA          | 14803.85 | 5291.00  | 35548.55 | 8734.53 | 4174.10  | 2033.85  | 6314.36  | 3026.78 |

|                      |                |            |            |              |                |            |            |              |
|----------------------|----------------|------------|------------|--------------|----------------|------------|------------|--------------|
|                      | <b>Naxos</b>   |            |            |              | <b>Tinos</b>   |            |            |              |
|                      | n=2            |            |            |              | n=2            |            |            |              |
|                      | <b>AVERAGE</b> | <b>Min</b> | <b>Max</b> | <b>STDEV</b> | <b>AVERAGE</b> | <b>Min</b> | <b>Max</b> | <b>STDEV</b> |
| <b>Lactate</b>       | 14248.58       | 13921.93   | 14575.22   | 461.94       | 13871.27       | 13026.78   | 14715.76   | 1194.29      |
| <b>Citrate</b>       | 0.00           | 0.00       | 0.00       | 0.00         | 59.62          | 0.00       | 119.23     | 84.31        |
| <b>Succinate</b>     | 503.04         | 390.47     | 615.61     | 159.20       | 167.77         | 164.77     | 170.77     | 4.25         |
| <b>Acetate</b>       | 236.06         | 175.85     | 296.27     | 85.15        | 239.35         | 109.08     | 369.63     | 184.24       |
| <b>Valine</b>        | 1251.80        | 1173.78    | 1329.82    | 110.34       | 1693.51        | 1646.89    | 1740.14    | 65.94        |
| <b>Isoleucine</b>    | 815.42         | 693.11     | 937.73     | 172.97       | 711.32         | 527.49     | 895.15     | 259.97       |
| <b>Alanine</b>       | 648.22         | 640.28     | 656.16     | 11.23        | 951.19         | 867.68     | 1034.70    | 118.10       |
| <b>Threonine</b>     | 344.15         | 306.22     | 382.08     | 53.64        | 499.29         | 445.83     | 552.74     | 75.60        |
| <b>Phenylalanine</b> | 1260.21        | 1211.27    | 1309.15    | 69.21        | 2035.78        | 2004.72    | 2066.83    | 43.92        |
| <b>Tyrosine</b>      | 462.92         | 333.25     | 592.59     | 183.38       | 863.61         | 848.06     | 879.17     | 22.00        |
| <b>Tyramine</b>      | 40.93          | 0.00       | 81.87      | 57.89        | 194.43         | 0.00       | 388.86     | 274.97       |
| <b>Aspartate</b>     | 457.84         | 397.29     | 518.39     | 85.63        | 605.85         | 540.61     | 671.08     | 92.26        |
| <b>Asparagine</b>    | 945.84         | 912.27     | 979.41     | 47.48        | 1341.64        | 1295.88    | 1387.40    | 64.72        |
| <b>Glycine</b>       | 339.74         | 312.67     | 366.82     | 38.30        | 465.11         | 439.30     | 490.91     | 36.50        |
| <b>Methionine</b>    | 413.66         | 413.46     | 413.86     | 0.28         | 814.36         | 777.31     | 851.41     | 52.40        |
| <b>Proline</b>       | 1977.51        | 1852.13    | 2102.89    | 177.31       | 2568.78        | 2525.20    | 2612.36    | 61.64        |
| <b>Glutamate</b>     | 1292.09        | 244.30     | 2339.89    | 1481.81      | 4890.77        | 4504.19    | 5277.34    | 546.70       |
| <b>Lysine</b>        | 2727.70        | 2307.64    | 3147.76    | 594.05       | 2956.64        | 2734.83    | 3178.44    | 313.68       |
| <b>Glutamine</b>     | 827.60         | 660.99     | 994.21     | 235.62       | 996.80         | 934.17     | 1059.42    | 88.57        |
| <b>Tryptophane</b>   | 32.55          | 0.00       | 65.09      | 46.03        | 168.69         | 165.31     | 172.07     | 4.78         |
| <b>Uracil</b>        | 8.87           | 8.10       | 9.63       | 1.08         | 8.85           | 8.21       | 9.50       | 0.91         |
| <b>Glycerol</b>      | 276.74         | 114.82     | 438.65     | 228.98       | 164.73         | 87.91      | 241.56     | 108.65       |
| <b>Benzoate</b>      | 6.69           | 6.11       | 7.28       | 0.82         | 5.09           | 4.96       | 5.22       | 0.19         |
| <b>Ornithine</b>     | 795.74         | 768.63     | 822.85     | 38.34        | 730.77         | 373.44     | 1088.10    | 505.34       |
| <b>Choline</b>       | 21.22          | 12.13      | 30.31      | 12.85        | 45.21          | 43.68      | 46.73      | 2.16         |
| <b>GABA</b>          | 1226.49        | 702.48     | 1750.49    | 741.06       | 0.00           | 0.00       | 0.00       | 0.00         |
| <b>Cytosine</b>      | 4.96           | 3.71       | 6.21       | 1.76         | 1.62           | 0.00       | 3.25       | 2.30         |
| <b>Propionate</b>    | 0.00           | 0.00       | 0.00       | 0.00         | 0.00           | 0.00       | 0.00       | 0.00         |
| <b>Butyrate</b>      | 0.00           | 0.00       | 0.00       | 0.00         | 0.00           | 0.00       | 0.00       | 0.00         |
| <b>Galactose</b>     | 0.00           | 0.00       | 0.00       | 0.00         | 0.00           | 0.00       | 0.00       | 0.00         |
| <b>CLA</b>           | 0.51           | 0.45       | 0.58       | 0.10         | 0.54           | 0.48       | 0.61       | 0.09         |
| <b>caproic</b>       | 0.47           | 0.46       | 0.48       | 0.02         | 0.59           | 0.52       | 0.66       | 0.10         |
| <b>butyric</b>       | 8.48           | 8.34       | 8.62       | 0.20         | 6.75           | 6.59       | 6.90       | 0.22         |
| <b>LN</b>            | 0.42           | 0.41       | 0.43       | 0.02         | 0.38           | 0.33       | 0.43       | 0.07         |
| <b>LO</b>            | 2.57           | 2.17       | 2.97       | 0.56         | 2.88           | 2.81       | 2.95       | 0.10         |
| <b>OL</b>            | 23.63          | 23.39      | 23.88      | 0.35         | 24.33          | 23.43      | 25.23      | 1.27         |
| <b>SAT</b>           | 64.39          | 63.94      | 64.84      | 0.63         | 65.12          | 64.44      | 65.81      | 0.97         |
| <b>Sterols</b>       | 0.18           | 0.16       | 0.19       | 0.02         | 0.19           | 0.18       | 0.19       | 0.01         |
| <b>1,2-DG</b>        | 2.76           | 1.98       | 3.54       | 1.10         | 2.62           | 2.50       | 2.74       | 0.16         |
| <b>TFAA</b>          | 13797.26       | 13637.93   | 13956.60   | 225.33       | 21563.32       | 21527.67   | 21598.98   | 50.42        |

**Table S3.** Analysis of Variance (ANOVA) of Cretan cheese samples. Grouping variable: Area of production (Chania, Rethymnon, Heraklion, Lasithi). Variables with  $p < 0.05$  are marked in red.

| Variables     | SS Effect    | df Effect | MS Effect | SS Error     | df Error | MS Error  | F        | p        |
|---------------|--------------|-----------|-----------|--------------|----------|-----------|----------|----------|
| Lactate       | 1.502395E+08 | 3         | 50079830  | 7.709802E+08 | 51       | 15117259  | 3.31276  | 0.027153 |
| Citrate       | 3.074792E+06 | 3         | 1024931   | 9.513367E+06 | 51       | 186537    | 5.49453  | 0.002387 |
| Succinate     | 7.035978E+04 | 3         | 23453     | 5.719689E+06 | 51       | 112151    | 0.20912  | 0.889624 |
| Acetate       | 2.758332E+05 | 3         | 91944     | 2.973142E+06 | 51       | 58297     | 1.57717  | 0.206269 |
| Valine        | 7.908772E+06 | 3         | 2636257   | 5.235684E+07 | 51       | 1026605   | 2.56794  | 0.064526 |
| Isoleucine    | 5.757008E+06 | 3         | 1919003   | 3.312859E+07 | 51       | 649580    | 2.95422  | 0.041118 |
| Alanine       | 2.945860E+06 | 3         | 981953    | 1.554328E+07 | 51       | 304770    | 3.22195  | 0.030152 |
| Threonine     | 7.778985E+05 | 3         | 259300    | 4.032469E+06 | 51       | 79068     | 3.27945  | 0.028216 |
| Phenylalanine | 7.312406E+06 | 3         | 2437469   | 2.943282E+07 | 51       | 577114    | 4.22355  | 0.009637 |
| Tyrosine      | 5.689648E+05 | 3         | 189655    | 3.756407E+06 | 51       | 73655     | 2.57491  | 0.064002 |
| Tyramine      | 2.247477E+04 | 3         | 7492      | 4.244452E+05 | 51       | 8322      | 0.90017  | 0.447600 |
| Aspartate     | 2.502645E+06 | 3         | 834215    | 1.852176E+07 | 51       | 363172    | 2.29703  | 0.088650 |
| Asparagine    | 6.401290E+06 | 3         | 2133763   | 2.739087E+07 | 51       | 537076    | 3.97293  | 0.012780 |
| Glycine       | 2.821408E+05 | 3         | 94047     | 2.267081E+06 | 51       | 44453     | 2.11567  | 0.109697 |
| Methionine    | 1.728437E+06 | 3         | 576146    | 9.924321E+06 | 51       | 194595    | 2.96075  | 0.040807 |
| Proline       | 3.326230E+07 | 3         | 11087435  | 2.671308E+08 | 51       | 5237858   | 2.11679  | 0.109553 |
| Glutamate     | 6.276669E+07 | 3         | 20922231  | 3.060655E+08 | 51       | 6001284   | 3.48629  | 0.022243 |
| Lysine        | 1.393843E+07 | 3         | 4646144   | 1.074189E+08 | 51       | 2106253   | 2.20588  | 0.098666 |
| Glutamine     | 5.128467E+06 | 3         | 1709489   | 2.210219E+07 | 51       | 433376    | 3.94458  | 0.013196 |
| Tryptophane   | 3.157540E+04 | 3         | 10525     | 2.075196E+05 | 51       | 4069      | 2.58666  | 0.063128 |
| Uracil        | 1.667727E+03 | 3         | 556       | 7.801071E+03 | 51       | 153       | 3.63429  | 0.018777 |
| Glycerol      | 1.640348E+05 | 3         | 54678     | 1.643072E+06 | 51       | 32217     | 1.69718  | 0.179272 |
| Benzoate      | 2.981405E+02 | 3         | 99        | 1.808830E+03 | 51       | 35        | 2.80203  | 0.049087 |
| Ornithine     | 1.423123E+06 | 3         | 474374    | 9.588714E+06 | 51       | 188014    | 2.52308  | 0.068006 |
| Choline       | 5.607726E+02 | 3         | 187       | 1.737696E+04 | 51       | 341       | 0.54861  | 0.651360 |
| GABA          | 1.515283E+06 | 3         | 505094    | 9.049649E+06 | 51       | 177444    | 2.84650  | 0.046608 |
| Cytosine      | 3.423929E+02 | 3         | 114       | 5.283319E+02 | 51       | 10        | 11.01709 | 0.000011 |
| CLA           | 3.289704E-01 | 3         | 0         | 1.817113E+00 | 51       | 0         | 3.07768  | 0.035629 |
| caproleic     | 2.247457E-01 | 3         | 0         | 2.995449E-01 | 51       | 0         | 12.75493 | 0.000002 |
| butyric       | 9.265674E+00 | 3         | 3         | 6.015411E+01 | 51       | 1         | 2.61855  | 0.060816 |
| LN            | 4.804903E-01 | 3         | 0         | 2.905450E+00 | 51       | 0         | 2.81138  | 0.048555 |
| LO            | 9.768583E-01 | 3         | 0         | 9.879828E+00 | 51       | 0         | 1.68086  | 0.182730 |
| OL            | 1.574917E+02 | 3         | 52        | 3.419198E+02 | 51       | 7         | 7.83037  | 0.000215 |
| SAT           | 2.067946E+02 | 3         | 69        | 3.765459E+02 | 51       | 7         | 9.33620  | 0.000051 |
| Sterols       | 5.041632E-04 | 3         | 0         | 1.254374E-02 | 51       | 0         | 0.68327  | 0.566374 |
| 1,2-DG        | 1.325171E+00 | 3         | 0         | 1.622639E+01 | 51       | 0         | 1.38835  | 0.256924 |
| TFAA          | 1.388877E+09 | 3         | 462959015 | 6.070246E+09 | 51       | 119024430 | 3.88961  | 0.014043 |
| Propionate    | 8.407624E-01 | 3         | 0         | 2.755356E+01 | 51       | 1         | 0.51873  | 0.671283 |
| Butyric       | 6.696764E+00 | 3         | 2         | 4.364988E+02 | 51       | 9         | 0.26081  | 0.853280 |
| Galactose     | 2.720950E+01 | 3         | 9         | 8.461952E+02 | 51       | 17        | 0.54664  | 0.652663 |



**Table S4.** Analysis of Variance (ANOVA) of cheese samples. Grouping variable: Area of production (Crete, Cyclades, Mainland)

| Variables       | SS Effect      | df Effect | MS Effect      | SS Error            | df Error  | MS Error      | F               | p               |
|-----------------|----------------|-----------|----------------|---------------------|-----------|---------------|-----------------|-----------------|
| Lactate         | 72882721       | 2         | 36441361       | 1.470928E+09        | 68        | 21631294      | 1.68466         | 0.193157        |
| Citrate         | 319026         | 2         | 159513         | 1.627717E+07        | 68        | 239370        | 0.66639         | 0.516882        |
| Succinate       | 29809          | 2         | 14904          | 6.496702E+06        | 68        | 95540         | 0.15600         | 0.855862        |
| Acetate         | 69420          | 2         | 34710          | 3.938707E+06        | 68        | 57922         | 0.59925         | 0.552098        |
| Valine          | 220701         | 2         | 110350         | 6.337427E+07        | 68        | 931975        | 0.11840         | 0.888519        |
| Isoleucine      | 614802         | 2         | 307401         | 4.025057E+07        | 68        | 591920        | 0.51933         | 0.597260        |
| Alanine         | 186972         | 2         | 93486          | 1.965176E+07        | 68        | 288997        | 0.32349         | 0.724730        |
| Threonine       | 165044         | 2         | 82522          | 4.936834E+06        | 68        | 72600         | 1.13666         | 0.326909        |
| Phenylalanine   | 2288873        | 2         | 1144437        | 4.181691E+07        | 68        | 614955        | 1.86101         | 0.163349        |
| <b>Tyrosine</b> | <b>846808</b>  | <b>2</b>  | <b>423404</b>  | <b>5.007872E+06</b> | <b>68</b> | <b>73645</b>  | <b>5.74924</b>  | <b>0.004933</b> |
| Tyramine        | 10770          | 2         | 5385           | 6.457556E+05        | 68        | 9496          | 0.56706         | 0.569852        |
| Aspartate       | 805898         | 2         | 402949         | 2.220548E+07        | 68        | 326551        | 1.23395         | 0.297575        |
| Asparagine      | 733190         | 2         | 366595         | 3.619627E+07        | 68        | 532298        | 0.68870         | 0.505696        |
| Glycine         | 179805         | 2         | 89902          | 2.907046E+06        | 68        | 42751         | 2.10295         | 0.129967        |
| Methionine      | 47850          | 2         | 23925          | 1.256059E+07        | 68        | 184715        | 0.12952         | 0.878730        |
| Proline         | 3636816        | 2         | 1818408        | 3.053996E+08        | 68        | 4491171       | 0.40489         | 0.668651        |
| Glutamate       | 6579619        | 2         | 3289810        | 4.006192E+08        | 68        | 5891459       | 0.55840         | 0.574723        |
| Lysine          | 7210436        | 2         | 3605218        | 1.322196E+08        | 68        | 1944406       | 1.85415         | 0.164416        |
| Glutamine       | 806828         | 2         | 403414         | 3.006697E+07        | 68        | 442161        | 0.91237         | 0.406431        |
| Tryptophane     | 10061          | 2         | 5031           | 2.760273E+05        | 68        | 4059          | 1.23930         | 0.296043        |
| <b>Uracil</b>   | <b>1164</b>    | <b>2</b>  | <b>582</b>     | <b>1.164013E+04</b> | <b>68</b> | <b>171</b>    | <b>3.40069</b>  | <b>0.039118</b> |
| Glycerol        | 43114          | 2         | 21557          | 2.566513E+06        | 68        | 37743         | 0.57115         | 0.567563        |
| <b>Benzoate</b> | <b>312</b>     | <b>2</b>  | <b>156</b>     | <b>2.421352E+03</b> | <b>68</b> | <b>36</b>     | <b>4.37445</b>  | <b>0.016325</b> |
| Ornithine       | 299110         | 2         | 149555         | 1.247760E+07        | 68        | 183494        | 0.81504         | 0.446899        |
| Choline         | 466            | 2         | 233            | 2.404914E+04        | 68        | 354           | 0.65873         | 0.520778        |
| <b>GABA</b>     | <b>8604986</b> | <b>2</b>  | <b>4302493</b> | <b>3.615796E+07</b> | <b>68</b> | <b>531735</b> | <b>8.09143</b>  | <b>0.000704</b> |
| Cytosine        | 20             | 2         | 10             | 1.065213E+03        | 68        | 16            | 0.63992         | 0.530480        |
| <b>CLA</b>      | <b>1</b>       | <b>2</b>  | <b>0</b>       | <b>2.548133E+00</b> | <b>68</b> | <b>0</b>      | <b>12.96349</b> | <b>0.000017</b> |
| caproic         | 0              | 2         | 0              | 6.232829E-01        | 68        | 0             | 2.22775         | 0.115579        |
| butyric         | 3              | 2         | 1              | 7.855513E+01        | 68        | 1             | 1.19826         | 0.308008        |
| <b>LN</b>       | <b>1</b>       | <b>2</b>  | <b>0</b>       | <b>3.823920E+00</b> | <b>68</b> | <b>0</b>      | <b>6.45332</b>  | <b>0.002715</b> |
| LO              | 0              | 2         | 0              | 1.170105E+01        | 68        | 0             | 1.22987         | 0.298749        |
| OL              | 15             | 2         | 8              | 5.307377E+02        | 68        | 8             | 0.96520         | 0.386063        |
| SAT             | 31             | 2         | 15             | 6.192266E+02        | 68        | 9             | 1.69422         | 0.191406        |
| <b>Sterols</b>  | <b>0</b>       | <b>2</b>  | <b>0</b>       | <b>1.583282E-02</b> | <b>68</b> | <b>0</b>      | <b>7.06198</b>  | <b>0.001634</b> |
| <b>1,2-DG</b>   | <b>6</b>       | <b>2</b>  | <b>3</b>       | <b>2.605879E+01</b> | <b>68</b> | <b>0</b>      | <b>7.79272</b>  | <b>0.000897</b> |
| TFAA            | 167200715      | 2         | 83600357       | 7.815880E+09        | 68        | 114939418     | 0.72734         | 0.486912        |
| Propionate      | 0              | 2         | 0              | 2.839432E+01        | 68        | 0             | 0.18328         | 0.832941        |
| Butyric         | 1              | 2         | 0              | 4.694759E+02        | 68        | 7             | 0.06932         | 0.933094        |
| Galactose       | 6              | 2         | 3              | 8.734047E+02        | 68        | 13            | 0.24754         | 0.781422        |

**Table S5.** Cross validation ANOVA of the untargeted OPLS-DA model regarding cretan/non cretan origin depicted in Figure 6, right.

| Cretan/Non cretan (OPLS-DA) | SS      | DF | MS       | F       | p            | SD       |
|-----------------------------|---------|----|----------|---------|--------------|----------|
| Total corr.                 | 73      | 73 | 1        |         |              | 1        |
| Regression                  | 35.4142 | 10 | 3.54142  | 5.93599 | 2.91834e-006 | 1.88186  |
| Residual                    | 37.5858 | 63 | 0.596601 |         |              | 0.772399 |

**Figure S1.** Permutation diagram of the untargeted PLS-DA model regarding cretan/non cretan origin depicted in Fig. 6, right.

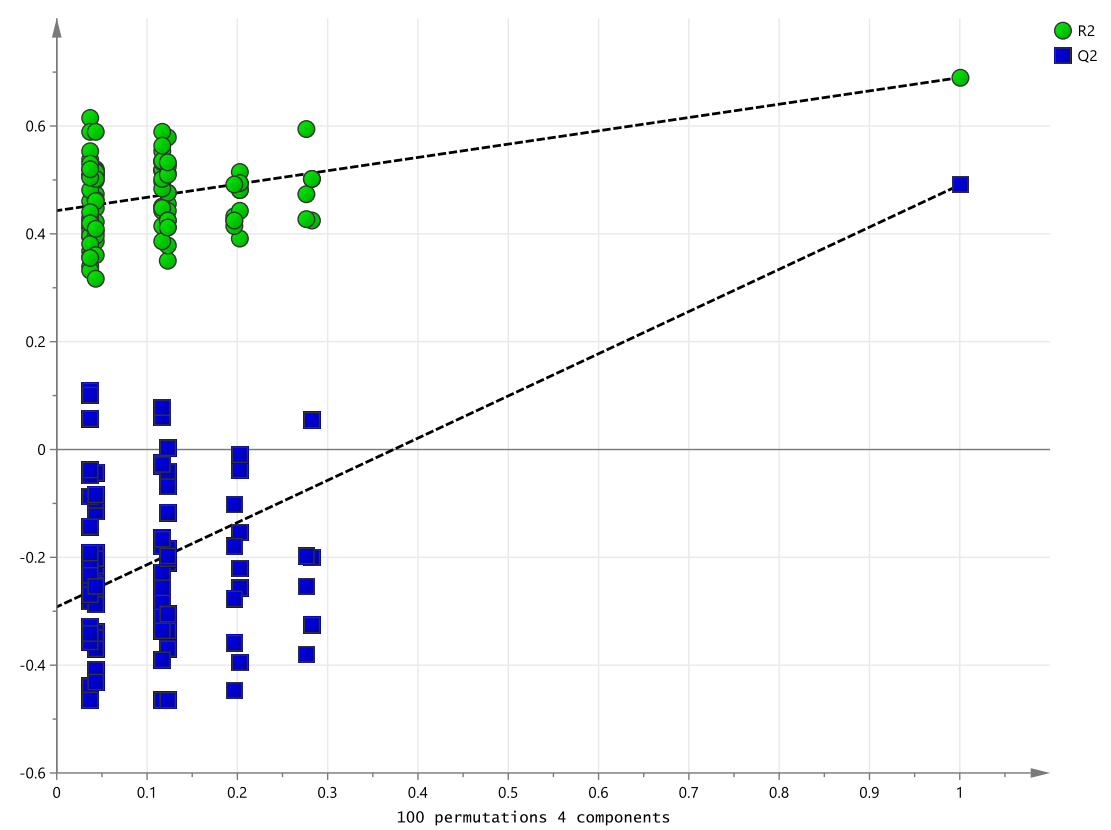

**Figure S2.** Aliphatic region of the  $^1\text{H}$ - $^{13}\text{C}$  multiplicity-edited gHSQC 2D NMR spectrum of the polar extracts of graviera cheese at a  $^1\text{H}$  frequency of 500 MHz, blue contours represent  $\text{CH}/\text{CH}_3$  protons, green contours represent  $\text{CH}_2$  protons.

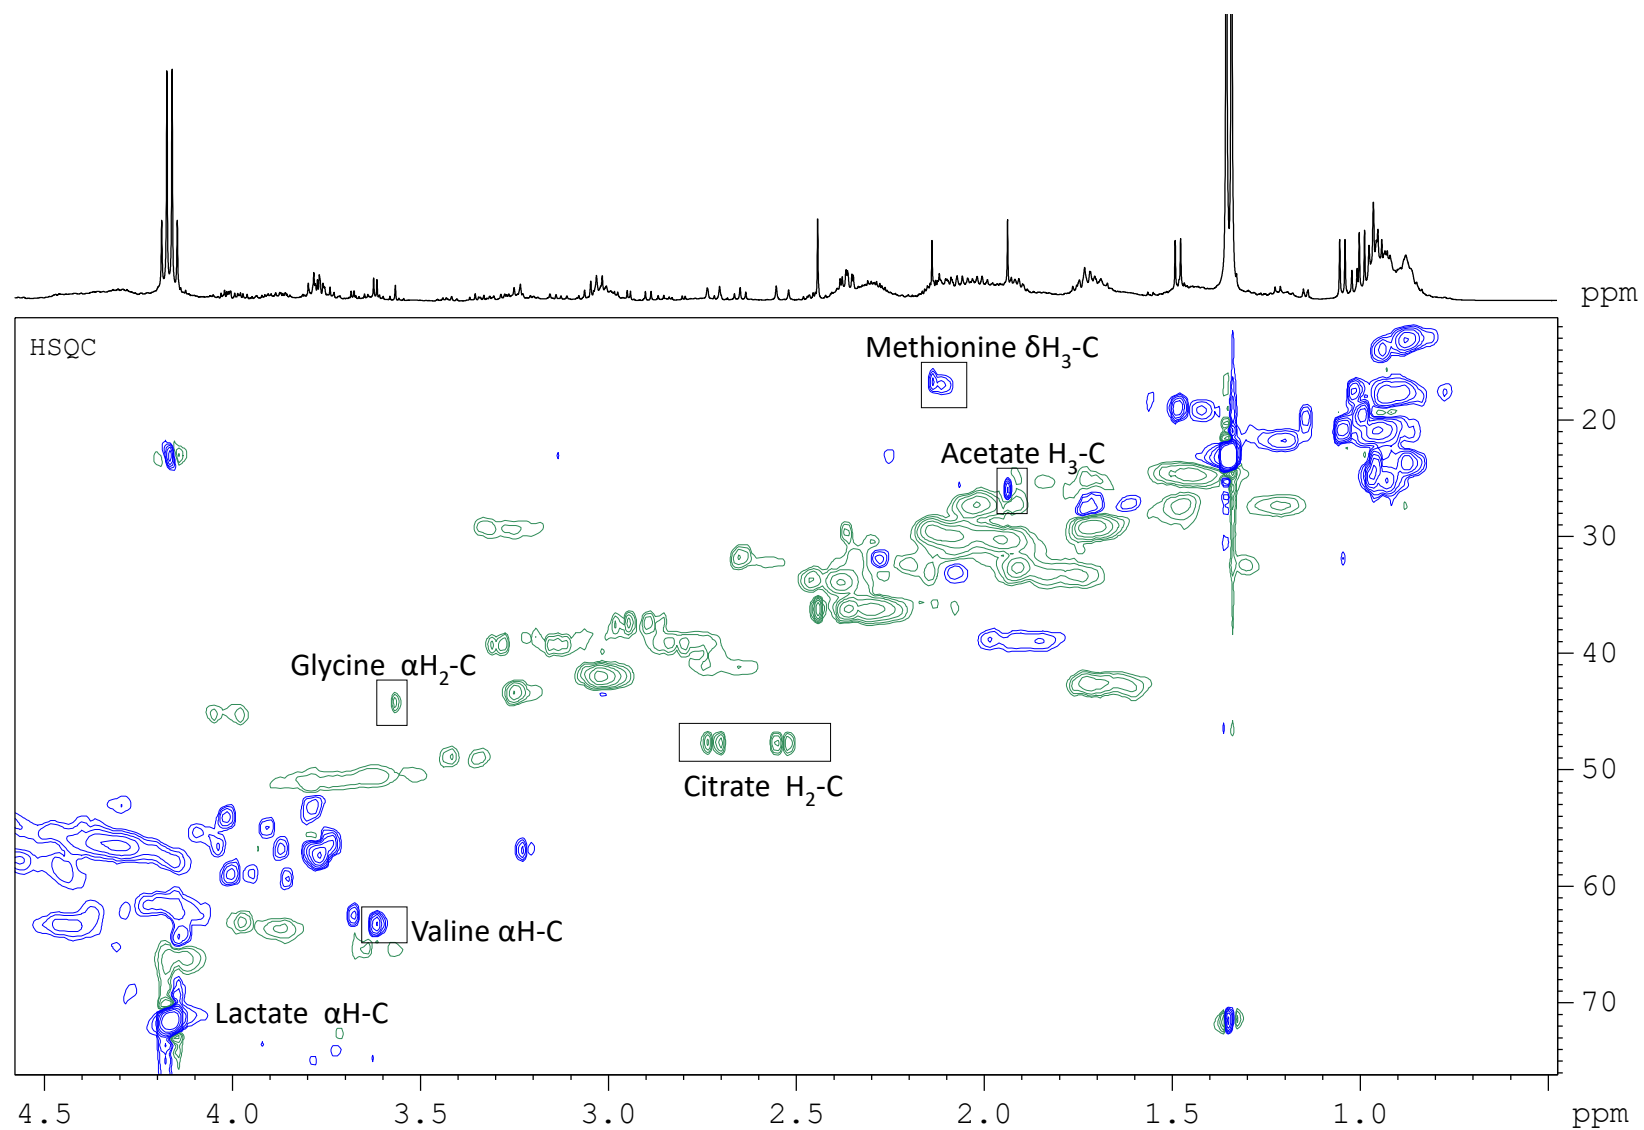

**Figure S3.** Aromatic region of the  $^1\text{H}$ - $^{13}\text{C}$  multiplicity-edited gHSQC 2D NMR spectrum of the polar extracts of graviera cheese at a  $^1\text{H}$  frequency of 500 MHz, blue contours represent CH/ $\text{CH}_3$  protons, green contours represent  $\text{CH}_2$  protons.

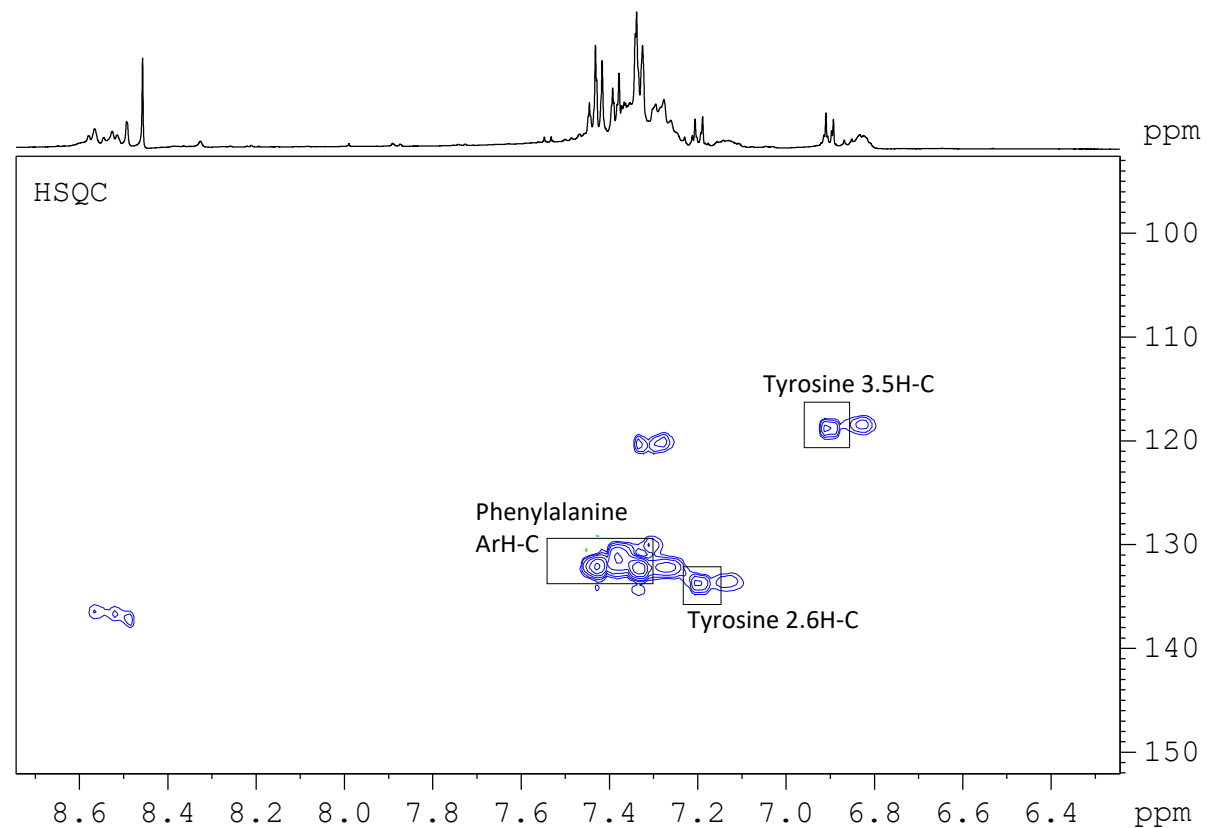

**Figure S4.** Aliphatic region of the long range  $^1\text{H}$ - $^{13}\text{C}$  gHMBC 2D NMR spectrum of the polar extracts of graviera cheese at a  $^1\text{H}$  frequency of 500 MHz.

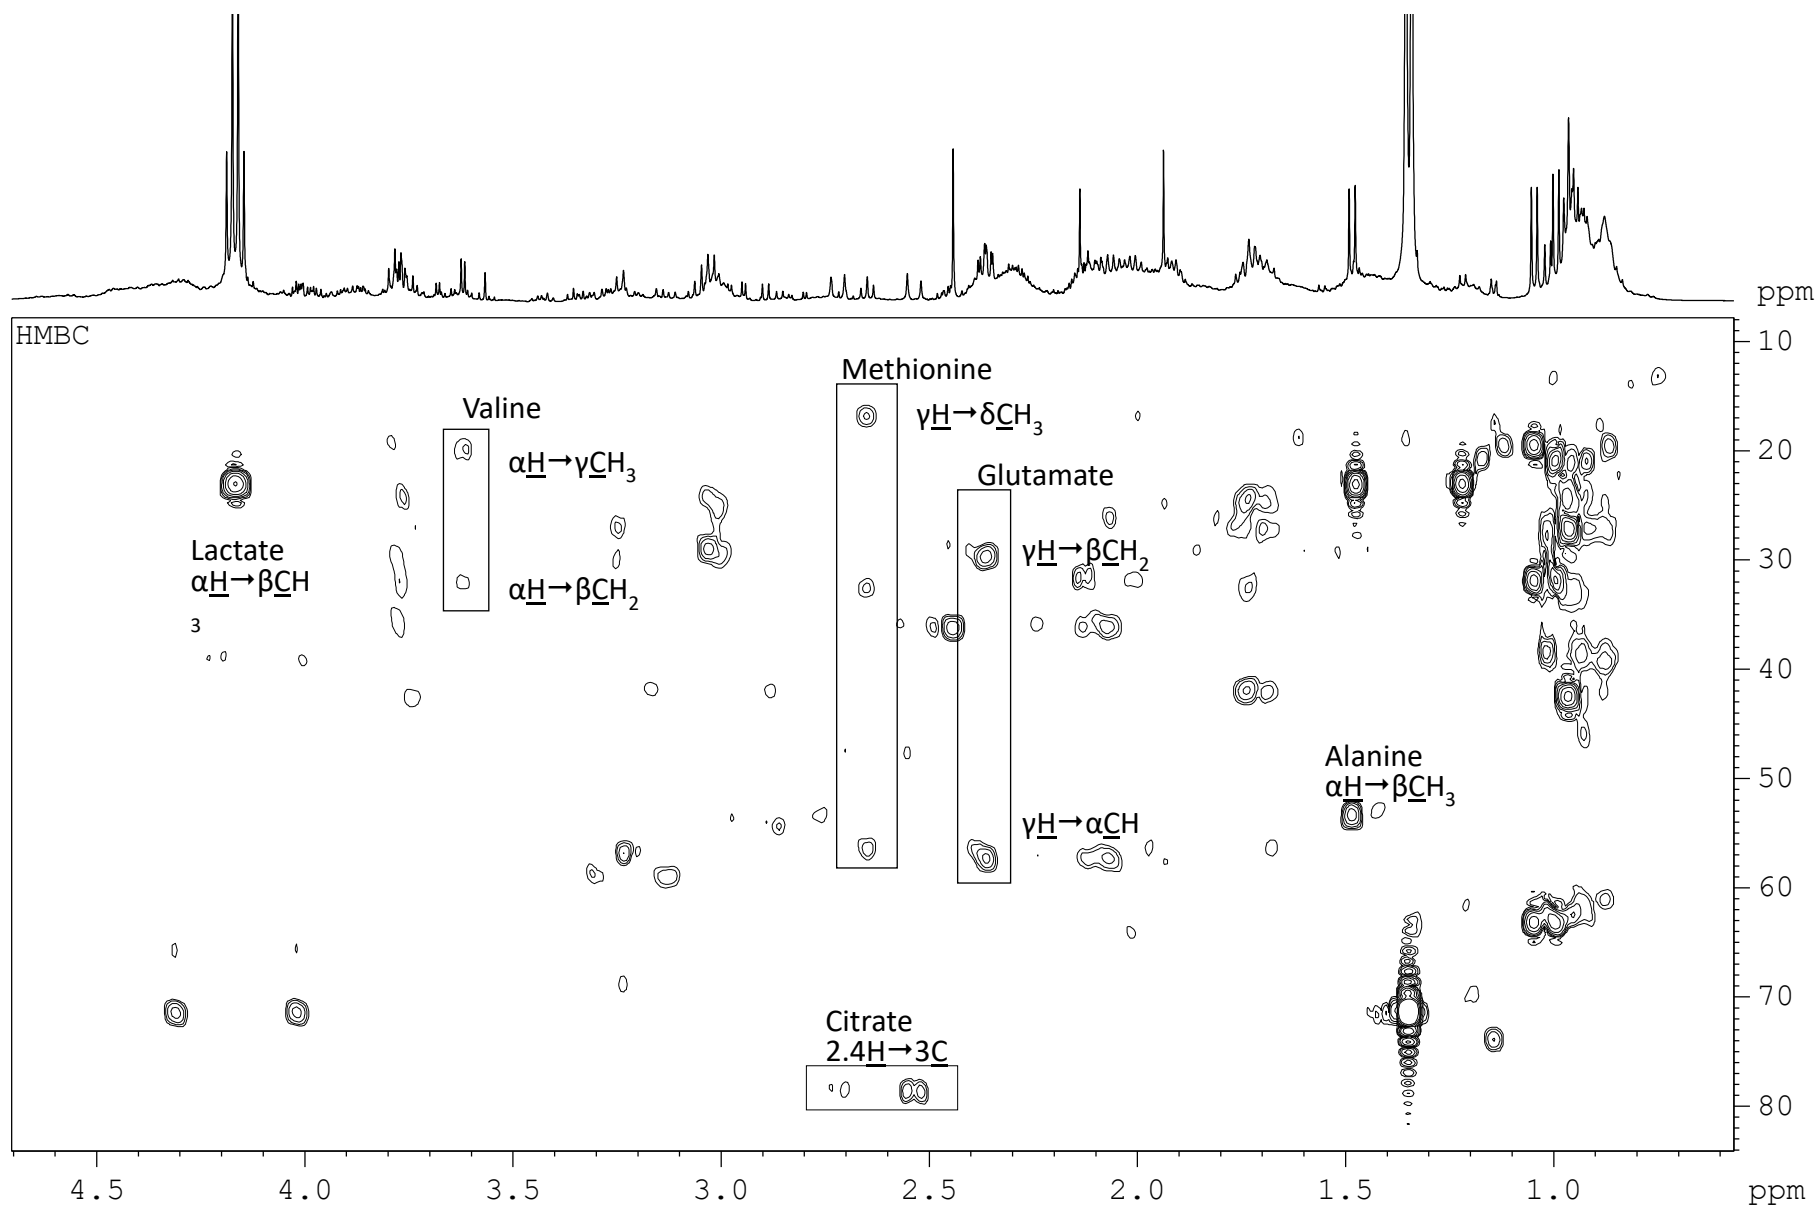

**Figure S5.** Aliphatic region of the  $^1\text{H}$ - $^1\text{H}$  gTOCSY 2D NMR spectrum of the polar extracts of graviera cheese at a  $^1\text{H}$  frequency of 500 MHz.

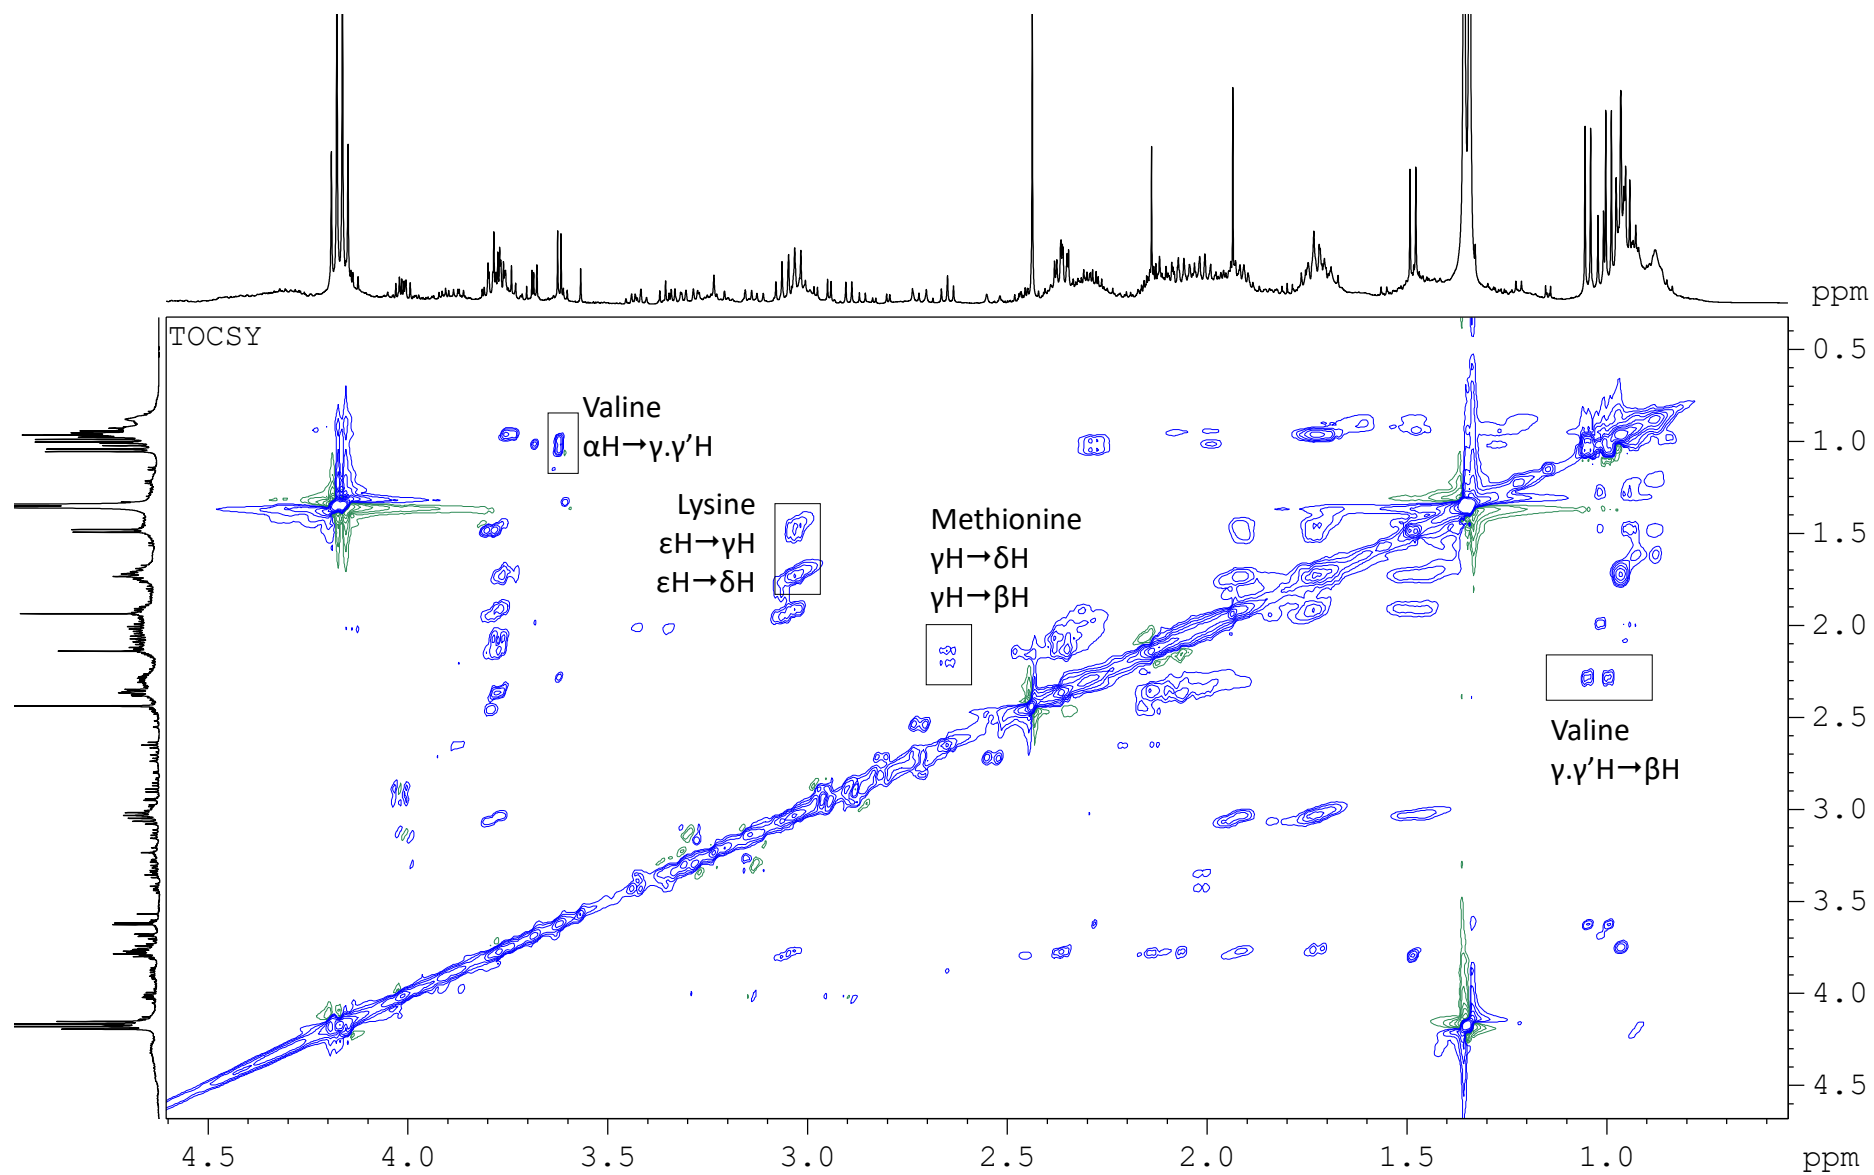

Supplement: s1 [file molecules-2446508-supplementary.pdf › molecules-2446508-supplementary.pdf]
